# Supplementary material for: Electrical control of surface acoustic waves
Source: Springer Nature journal article supplement (doi:10.1038/s41928-022-00773-3), 2022-06-06
Supplement: MOESM10 [file 41928_2022_773_MOESM10_ESM.xlsx]

## Sheet: Sheet1
Extended Data Figure 6		Noise	Noise std err
	No input	64.359	0.3864
	Carrier only	64.2391	0.36259
	Modulation	64.3271	0.36918
